# Supplementary material for: Sensitive and selective detection of Hg2+ and Cu2+ ions by fluorescent Ag nanoclusters synthesized via a hydrothermal method
Source: Royal Society of Chemistry journal article supplement (doi:10.1039/c3nr03329e), 2013-01-01
Supplement: c3nr03329e.pdf [file c3nr03329e.pdf]

## Electronic Supplementary Information

### **Sensitive and selective detection of Hg<sup>2+</sup> and Cu<sup>2+</sup> ions by fluorescent Ag nanoclusters synthesized via hydrothermal method**

**Jing Liu,<sup>a,b</sup> Xiangling Ren,<sup>b</sup> Xianwei Meng,<sup>b</sup> Zheng Fang<sup>\*,a</sup> and Fangqiong Tang<sup>\*,b</sup>**

<sup>a</sup> College of Chemistry and Chemical Engineering, Central South University, Hunan 410083, China. E-mail: zfang@csu.edu.cn; Tel: +86-0731-88660356

<sup>b</sup> Laboratory of Controllable Preparation and Application of Nanomaterials, Technical Institute of Physics and Chemistry, Chinese Academy of Sciences, Beijing 100190, People's Republic of China. E-mail: tangfq@mail.ipc.ac.cn; Fax: +86-10-62554670; Tel: +86-10-82543521

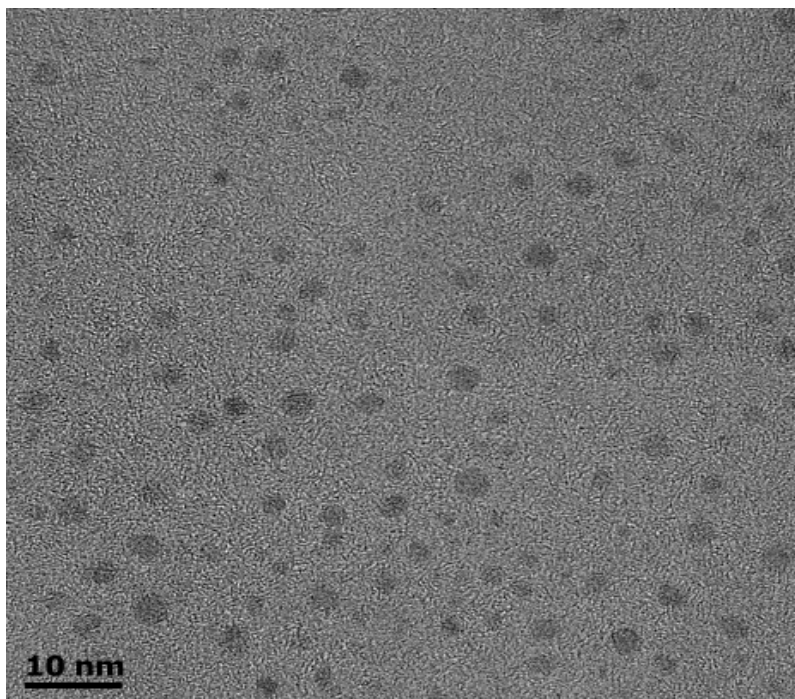

**Figure S1.** The TEM image of Ag NCs prepared without N<sub>2</sub> incoming (2.9nm in average diameter).

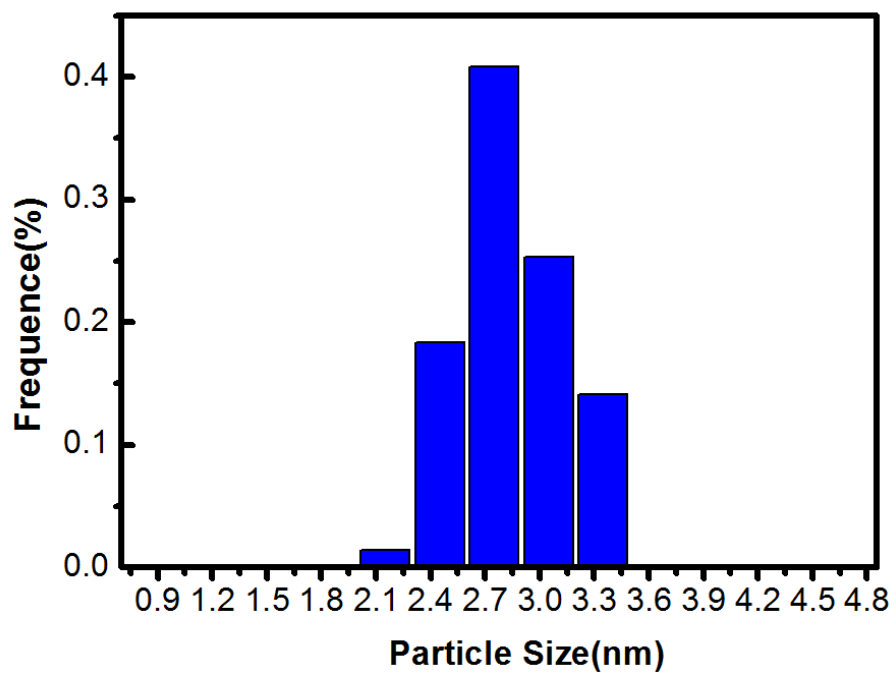

**Figure S2.** Size distribution histogram of the Ag NCs prepared without N<sub>2</sub> incoming.

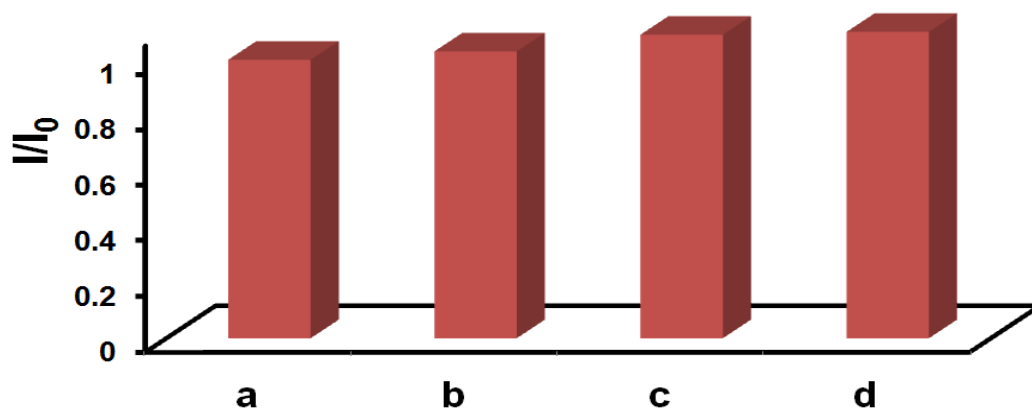

**Figure S3.** Relative fluorescence ( $I/I_0$ ) of freshly prepared Ag NCs (a) , placed on two months Ag NCs (b), placed on four months Ag NCs (c) and placed on six months Ag NCs (d), ( $I_0$  and  $I$  correspond to the fluorescence intensity of freshly prepared and placed months).

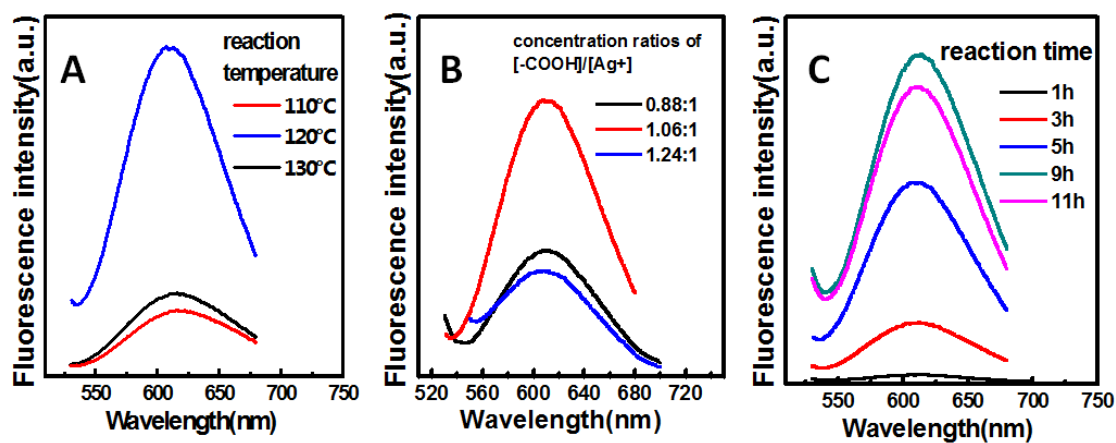

**Figure S4.** Temporal evolution of fluorescence emission spectra of the Ag NCs with different reaction temperatures (A), concentration ratios of  $[-COOH]/[Ag^+]$ (B) and times (C), as labeled respectively.

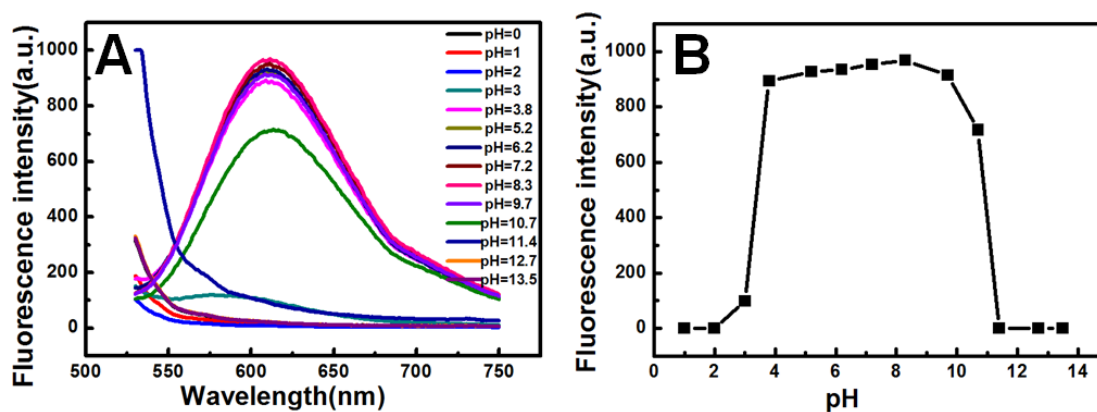

**Figure S5.** (A) Fluorescence spectra of the Ag NCs in a solution with different pH from 0 to 13.5. (B) Corresponding fluorescence intensity of the Ag NCs in a solution with different pH from 0 to 13.5.

**Table S1.** Determination of  $\text{Hg}^{2+}$  by fluorescent metal probes

| Fluorescent metal probe | Linear range                      | LOD               | Reference                       |
|-------------------------|-----------------------------------|-------------------|---------------------------------|
| DNA-Ag NCs              | 2.5 nM–50nM                       | 0.9 nM            | G.-Y. Lan et al. <sup>(1)</sup> |
| dBSA-Ag NCs             | 10 nM–5 $\mu\text{M}$             | 10 nM             | C. Guo et al. <sup>(2)</sup>    |
| Lys-AgNCs               | 1 $\mu\text{M}$ –15 $\mu\text{M}$ | 0.6 $\mu\text{M}$ | T. Zhou et al. <sup>(3)</sup>   |
| CTAB-coatedGSH–Ag NCs   | 0–125 nM                          | 5 nM              | Xun Yuan et al. <sup>(4)</sup>  |
| PMAA-Ag NCs             | 10 nM–20 $\mu\text{M}$            | 10 nM             | This paper                      |

**Table S2.** Determination of Cu<sup>2+</sup> by fluorescent metal probes

| Fluorescent metal probe | Linear range | LOD   | Reference                       |
|-------------------------|--------------|-------|---------------------------------|
| DNA-Ag NCs              | 1 nM-200 nM  | 8 nM  | G. Y. Lane t al. <sup>(5)</sup> |
| 11-MUA-Au NPs           | 10 nM– 1 μM  | 87 nM | Y. Guo et al. <sup>(6)</sup>    |
| MPAA-Ag NCs             | 5 μM – 15mM  | 5 μM  | X. Liu et al. <sup>(7)</sup>    |
| PMAA-Ag NCs             | 10 nM–30 μM  | 10 nM | This paper                      |

1. G.-Y. Lan, W.-Y. C. and H.-T. Chang, *RSC Adv.*, 2011, **1**, 802–807.
2. C. Guo and J. Irudayaraj, *Anal. Chem.*, 2011, **83**, 2883-2889.
3. T. Zhou, Y. Huang, W. Li, Z. Cai, F. Luo, C. J. Yang and X. Chen, *Nanoscale*, 2012, **4**, 5312-5315.
4. Xun Yuan, Teik Jin Yeow, Qingbo Zhang, J. Y. Lee and J. Xie, *Nanoscale*, 2012, **4**, 1968–1971.
5. G. Y. Lan, C. C. Huang and H. T. Chang, *Chem. Commun.* , 2010, **46**, 1257-1259.
6. Y. Guo, Z. Wang, H. Shao and X. Jiang, *Analyst*, 2012, **137**, 301-304.
7. X. Liu, C. Zong and L. Lu, *Analyst*, 2012, **137**, 2406-2414.
